# Supplementary material
Source: PubMed Central journal article supplement (PMC4776011)
Supplement: AAC.02967-15_zac003164908so1.pdf [file AAC.02967-15_zac003164908so1.pdf]

1 **Supplementary Materials**

2 **Supplemental Tables**

**Table S1.** Probability of decreased susceptibility at 30 days post-start of therapy and number of events by AUC:MIC ratio category

| <b>AUC:MIC ratio category</b> | <b>Kaplan-Meier estimated % probability of decreased susceptibility at 30 days<sup>a</sup></b> | <b>Number of events with decreased susceptibility<sup>b</sup></b> | <b>Total</b> |
|-------------------------------|------------------------------------------------------------------------------------------------|-------------------------------------------------------------------|--------------|
| <1480                         | 0                                                                                              | 0                                                                 | 21           |
| ≥1480 - <1970                 | 0.278                                                                                          | 5                                                                 | 18           |
| ≥1970                         | 0.081                                                                                          | 6                                                                 | 62           |
| Total                         |                                                                                                | 11                                                                | 101          |

Log rank p=0.013.

a. Decreased susceptibility was defined as a ≥4 fold increase in the MIC value of *S. aureus* relative to the baseline value.

b. The observation period ended at Day 43.

**Table S2.** Mean probability of response by cohort and MIC for simulated patients receiving daptomycin 6, 8, and 10 mg/kg/day

| Cohort <sup>a</sup>                                                                           | MIC (mg/L) | Daptomycin dosing regimen       |                                                   |                                 |                                                   |                                 |                                                   |
|-----------------------------------------------------------------------------------------------|------------|---------------------------------|---------------------------------------------------|---------------------------------|---------------------------------------------------|---------------------------------|---------------------------------------------------|
|                                                                                               |            | 6 mg/kg/day                     |                                                   | 8 mg/kg/day                     |                                                   | 10 mg/kg/day                    |                                                   |
|                                                                                               |            | Probability of clinical success | Probability of decreased susceptibility on Day 30 | Probability of clinical success | Probability of decreased susceptibility on Day 30 | Probability of clinical success | Probability of decreased susceptibility on Day 30 |
| Uncomplicated bacteremia, CLcr >88.9 mL/min/1.73 m <sup>2</sup> , and albumin <2.9 g/L        | 0.12       | 0.943                           | 0.087                                             | 0.951                           | 0.082                                             | 0.953                           | 0.081                                             |
|                                                                                               | 0.25       | 0.899                           | 0.097                                             | 0.920                           | 0.097                                             | 0.933                           | 0.093                                             |
|                                                                                               | 0.5        | 0.869                           | 0.042                                             | 0.880                           | 0.068                                             | 0.889                           | 0.090                                             |
|                                                                                               | 1          | 0.859                           | 0.004                                             | 0.861                           | 0.014                                             | 0.865                           | 0.029                                             |
| Uncomplicated bacteremia, CLcr 51.2 to 88.9 mL/min/1.73 m <sup>2</sup> , and albumin <2.9 g/L | 0.12       | 0.762                           | 0.087                                             | 0.783                           | 0.082                                             | 0.790                           | 0.081                                             |
|                                                                                               | 0.25       | 0.639                           | 0.097                                             | 0.696                           | 0.097                                             | 0.734                           | 0.093                                             |
|                                                                                               | 0.5        | 0.554                           | 0.042                                             | 0.584                           | 0.068                                             | 0.610                           | 0.090                                             |
|                                                                                               | 1          | 0.527                           | 0.004                                             | 0.532                           | 0.014                                             | 0.542                           | 0.029                                             |
| Left-sided endocarditis, CLcr >88.9 mL/min/1.73 m <sup>2</sup> , and albumin ≥2.9 g/L         | 0.12       | 0.798                           | 0.087                                             | 0.817                           | 0.082                                             | 0.824                           | 0.081                                             |
|                                                                                               | 0.25       | 0.685                           | 0.097                                             | 0.737                           | 0.097                                             | 0.772                           | 0.093                                             |
|                                                                                               | 0.5        | 0.606                           | 0.042                                             | 0.634                           | 0.068                                             | 0.658                           | 0.090                                             |
|                                                                                               | 1          | 0.581                           | 0.004                                             | 0.585                           | 0.014                                             | 0.595                           | 0.029                                             |
| Left-sided endocarditis, CLcr, ≤ 51.2 mL/min/1.73 m <sup>2</sup> , and albumin <2.9 g/L       | 0.12       | 0.013                           | 0.087                                             | 0.014                           | 0.082                                             | 0.014                           | 0.081                                             |
|                                                                                               | 0.25       | 0.008                           | 0.097                                             | 0.010                           | 0.097                                             | 0.012                           | 0.093                                             |
|                                                                                               | 0.5        | 0.005                           | 0.042                                             | 0.006                           | 0.068                                             | 0.007                           | 0.090                                             |
|                                                                                               | 1          | 0.004                           | 0.004                                             | 0.004                           | 0.014                                             | 0.005                           | 0.029                                             |

Figure S1. Mean model-predicted probabilities of clinical success by MIC value for simulated patients evaluated for 18 clinical scenarios

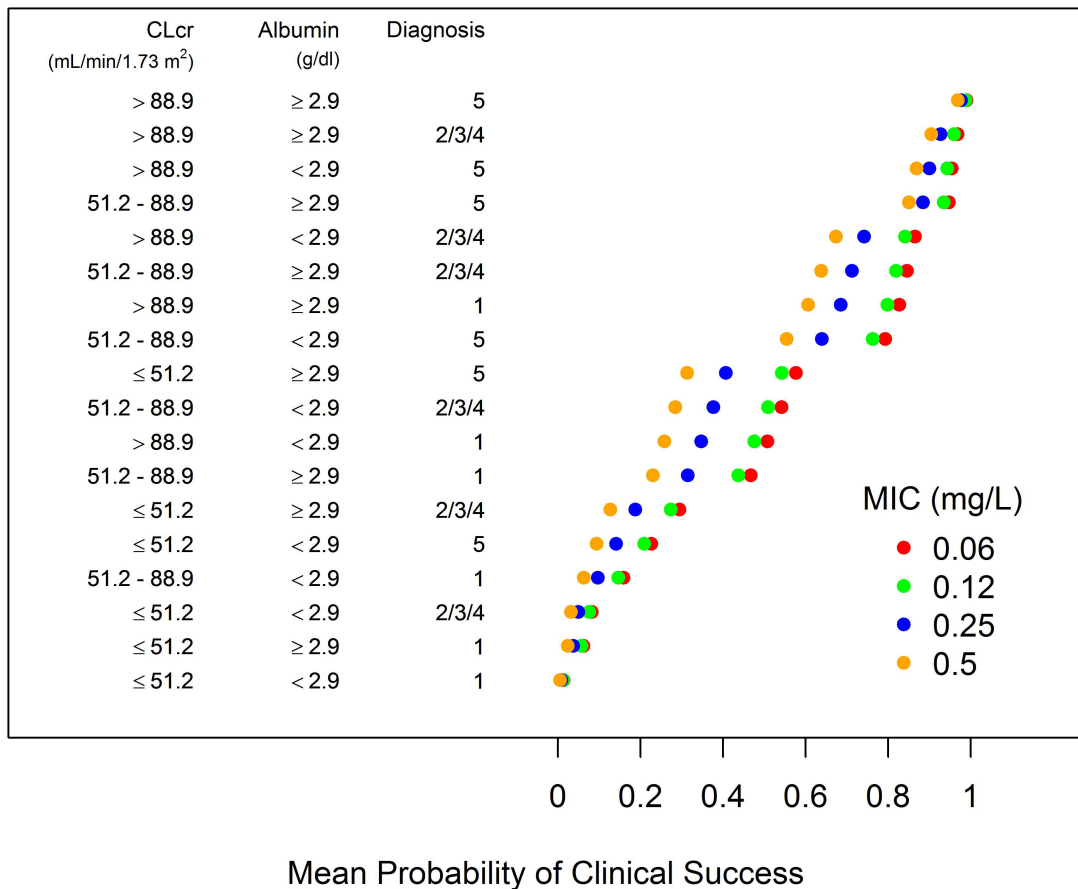

CLcr=creatinine clearance normalized for body surface area; Diagnosis: 1=left-sided endocarditis; 2, 3, or 4=complicated right-sided endocarditis, uncomplicated right-sided endocarditis, or complicated bacteremia, respectively; 5=uncomplicated bacteremia

Figure S2. Mean model-predicted joint probabilities of favorable outcomes by MIC value for simulated patients evaluated for 18 clinical scenarios

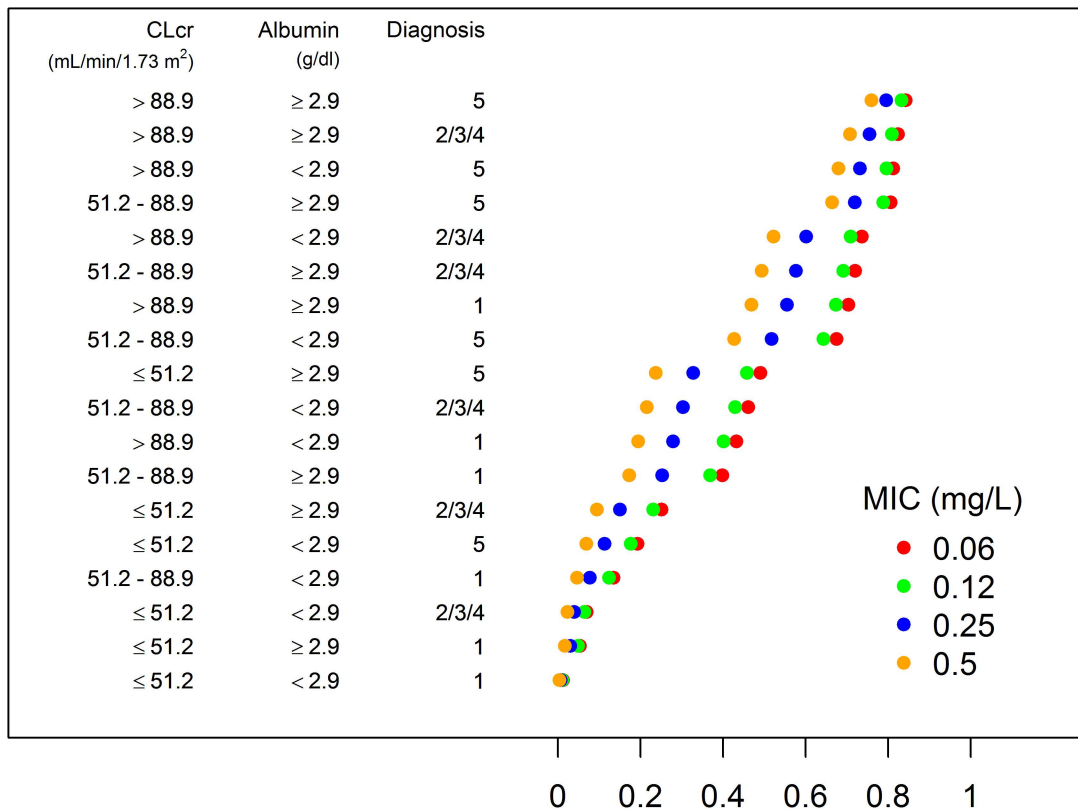

### Mean Joint Probability of Favorable Outcomes

CLcr=creatinine clearance normalized for body surface area; Diagnosis: 1=left-sided endocarditis; 2, 3, or 4=complicated right-sided endocarditis, uncomplicated right-sided endocarditis, or complicated bacteremia, respectively; 5=uncomplicated bacteremia
